# Supplementary material
Source: publisher figshare collection journal article supplement (https://tandf.figshare.com/articles/dataset/_/11985267)
Supplement: Supplementary file 1 [file 1]

Fecha oficial recibido:

## Speech Spatial Qualities of Hearing Scale (SSQ<sub>12</sub>)

Cuestionario sobre el lenguaje, la audición espacial y las calidades auditivas

|                                   |                        |  |  |  |     |     |  |     |  |  |
|-----------------------------------|------------------------|--|--|--|-----|-----|--|-----|--|--|
| Sujeto ID                         |                        |  |  |  |     |     |  |     |  |  |
| Persona que guía el cuestionario: | Fecha<br>(ej. 01ENE17) |  |  |  |     |     |  |     |  |  |
|                                   |                        |  |  |  | Día | Mes |  | Año |  |  |

Las siguientes preguntas tratan aspectos de su habilidad y experiencia auditiva en diferentes situaciones diarias, y en sus condiciones auditivas.

Marque cada pregunta, por ejemplo con una cruz (x), en cualquier lugar de la escala del 0 al 10 situada al lado de cada pregunta. Si coloca la marca en el 10 significa que podría hacer o experimentar perfectamente lo que se describe en la pregunta. Si coloca la marca en el 0 significa que no sería capaz de hacer o experimentar lo que está descrito.

Como ejemplo, la pregunta 1 trata sobre si puede mantener una conversación con alguien mientras la TV está encendida. Si puede mantener la conversación sin problemas, coloque la marca hacia la derecha de la escala. Si puede seguir la conversación a medias, coloque la marca alrededor del nivel medio, etc.

Creemos que todas las preguntas son relevantes en su experiencia diaria, pero si alguna describe una situación extraña para usted, marque con una cruz la casilla "no aplica (N/A)".

Por favor, marque una de las siguientes opciones:

- ☐ Llevo Implante Coclear
- ☐ No uso audífono (sin audición)
- ☐ Uso audífono (\_\_\_años)
- ☐ No uso audífono (audición normal)
- ☐ Otros:

|                  |  |  |  |  |  |  |  |  |  |                         |  |  |  |  |  |  |  |  |  |
|------------------|--|--|--|--|--|--|--|--|--|-------------------------|--|--|--|--|--|--|--|--|--|
|                  |  |  |  |  |  |  |  |  |  | Fecha oficial recibida: |  |  |  |  |  |  |  |  |  |
| <b>Sujeto ID</b> |  |  |  |  |  |  |  |  |  |                         |  |  |  |  |  |  |  |  |  |

  

|                                                                                                                                                                                |   |   |   |   |   |   |   |   |    |               |                          |
|--------------------------------------------------------------------------------------------------------------------------------------------------------------------------------|---|---|---|---|---|---|---|---|----|---------------|--------------------------|
| <b>1. Está hablando con otra persona y hay un televisor funcionando en la misma habitación. Sin bajar el volumen de la TV. ¿Puede oír lo que dice su interlocutor?</b>         |   |   |   |   |   |   |   |   |    |               |                          |
| 1                                                                                                                                                                              | 2 | 3 | 4 | 5 | 6 | 7 | 8 | 9 | 10 |               | <input type="checkbox"/> |
| En absoluto                                                                                                                                                                    |   |   |   |   |   |   |   |   |    | Perfectamente | N/A                      |
| <b>2. Está en un grupo de unas cinco personas en un restaurante lleno de gente. Puede ver a todos los miembros del grupo. ¿Puede seguir la conversación?</b>                   |   |   |   |   |   |   |   |   |    |               |                          |
| 1                                                                                                                                                                              | 2 | 3 | 4 | 5 | 6 | 7 | 8 | 9 | 10 |               | <input type="checkbox"/> |
| En absoluto                                                                                                                                                                    |   |   |   |   |   |   |   |   |    | Perfectamente | N/A                      |
| <b>3. Está escuchando a alguien que habla con usted mientras intenta oír las noticias de la TV al mismo tiempo. ¿Puede entender lo que ambas personas dicen?</b>               |   |   |   |   |   |   |   |   |    |               |                          |
| 1                                                                                                                                                                              | 2 | 3 | 4 | 5 | 6 | 7 | 8 | 9 | 10 |               | <input type="checkbox"/> |
| En absoluto                                                                                                                                                                    |   |   |   |   |   |   |   |   |    | Perfectamente | N/A                      |
| <b>4. Está conversando con una persona en una estancia donde hay muchas otras personas hablando. ¿Puede oír lo que dice su interlocutor?</b>                                   |   |   |   |   |   |   |   |   |    |               |                          |
| 1                                                                                                                                                                              | 2 | 3 | 4 | 5 | 6 | 7 | 8 | 9 | 10 |               | <input type="checkbox"/> |
| En absoluto                                                                                                                                                                    |   |   |   |   |   |   |   |   |    | Perfectamente | N/A                      |
| <b>5. Está en un grupo y la conversación salta de una persona a otra. ¿Puede seguir la conversación fácilmente sin perderse el principio de lo que dice cada interlocutor?</b> |   |   |   |   |   |   |   |   |    |               |                          |
| 1                                                                                                                                                                              | 2 | 3 | 4 | 5 | 6 | 7 | 8 | 9 | 10 |               | <input type="checkbox"/> |
| En absoluto                                                                                                                                                                    |   |   |   |   |   |   |   |   |    | Perfectamente | N/A                      |
| <b>6. Está al aire libre. Un perro ladra fuertemente. ¿Puede determinar inmediatamente dónde está sin tener que mirar?</b>                                                     |   |   |   |   |   |   |   |   |    |               |                          |
| 1                                                                                                                                                                              | 2 | 3 | 4 | 5 | 6 | 7 | 8 | 9 | 10 |               | <input type="checkbox"/> |
| En absoluto                                                                                                                                                                    |   |   |   |   |   |   |   |   |    | Perfectamente | N/A                      |
| <b>7. ¿Puede determinar a qué distancia está un autobús o camión sólo por el ruido que hacen?</b>                                                                              |   |   |   |   |   |   |   |   |    |               |                          |
| 1                                                                                                                                                                              | 2 | 3 | 4 | 5 | 6 | 7 | 8 | 9 | 10 |               | <input type="checkbox"/> |
| En absoluto                                                                                                                                                                    |   |   |   |   |   |   |   |   |    | Perfectamente | N/A                      |
| <b>8. ¿Puede saber si un autobús o camión se acerca o se aleja de usted a partir del ruido que hacen?</b>                                                                      |   |   |   |   |   |   |   |   |    |               |                          |
| 1                                                                                                                                                                              | 2 | 3 | 4 | 5 | 6 | 7 | 8 | 9 | 10 |               | <input type="checkbox"/> |
| En absoluto                                                                                                                                                                    |   |   |   |   |   |   |   |   |    | Perfectamente | N/A                      |

|                  |  |  |  |  |  |  |  |  |  |                         |  |  |  |  |  |  |  |  |  |  |
|------------------|--|--|--|--|--|--|--|--|--|-------------------------|--|--|--|--|--|--|--|--|--|--|
|                  |  |  |  |  |  |  |  |  |  | Fecha oficial recibida: |  |  |  |  |  |  |  |  |  |  |
| <b>Sujeto ID</b> |  |  |  |  |  |  |  |  |  |                         |  |  |  |  |  |  |  |  |  |  |

  

|                                                                                                                |   |   |   |   |   |   |   |   |    |              |                          |  |  |  |  |  |  |  |  |     |
|----------------------------------------------------------------------------------------------------------------|---|---|---|---|---|---|---|---|----|--------------|--------------------------|--|--|--|--|--|--|--|--|-----|
| <b>9. Cuando oye más de un sonido a la vez, ¿tiene la impresión de que se han mezclado en un único sonido?</b> |   |   |   |   |   |   |   |   |    |              |                          |  |  |  |  |  |  |  |  |     |
| 1                                                                                                              | 2 | 3 | 4 | 5 | 6 | 7 | 8 | 9 | 10 |              | <input type="checkbox"/> |  |  |  |  |  |  |  |  |     |
| Mezclados                                                                                                      |   |   |   |   |   |   |   |   |    | No mezclados |                          |  |  |  |  |  |  |  |  | N/A |

  

|                                                                                         |   |   |   |   |   |   |   |   |    |               |                          |  |  |  |  |  |  |  |  |     |
|-----------------------------------------------------------------------------------------|---|---|---|---|---|---|---|---|----|---------------|--------------------------|--|--|--|--|--|--|--|--|-----|
| <b>10. Cuando escucha música, ¿puede distinguir los instrumentos que están tocando?</b> |   |   |   |   |   |   |   |   |    |               |                          |  |  |  |  |  |  |  |  |     |
| 1                                                                                       | 2 | 3 | 4 | 5 | 6 | 7 | 8 | 9 | 10 |               | <input type="checkbox"/> |  |  |  |  |  |  |  |  |     |
| En absoluto                                                                             |   |   |   |   |   |   |   |   |    | Perfectamente |                          |  |  |  |  |  |  |  |  | N/A |

  

|                                                                                               |   |   |   |   |   |   |   |   |    |               |                          |  |  |  |  |  |  |  |  |     |
|-----------------------------------------------------------------------------------------------|---|---|---|---|---|---|---|---|----|---------------|--------------------------|--|--|--|--|--|--|--|--|-----|
| <b>11. Los sonidos cotidianos que puede oír fácilmente, ¿le parecen claros (no confusos)?</b> |   |   |   |   |   |   |   |   |    |               |                          |  |  |  |  |  |  |  |  |     |
| 1                                                                                             | 2 | 3 | 4 | 5 | 6 | 7 | 8 | 9 | 10 |               | <input type="checkbox"/> |  |  |  |  |  |  |  |  |     |
| En absoluto                                                                                   |   |   |   |   |   |   |   |   |    | Perfectamente |                          |  |  |  |  |  |  |  |  | N/A |

  

|                                                                           |   |   |   |   |   |   |   |   |    |                          |                          |  |  |  |  |  |  |  |  |     |
|---------------------------------------------------------------------------|---|---|---|---|---|---|---|---|----|--------------------------|--------------------------|--|--|--|--|--|--|--|--|-----|
| <b>12. ¿Tiene que concentrarse mucho cuando escucha a alguien o algo?</b> |   |   |   |   |   |   |   |   |    |                          |                          |  |  |  |  |  |  |  |  |     |
| 1                                                                         | 2 | 3 | 4 | 5 | 6 | 7 | 8 | 9 | 10 |                          | <input type="checkbox"/> |  |  |  |  |  |  |  |  |     |
| Gran concentración                                                        |   |   |   |   |   |   |   |   |    | No necesito concentrarme |                          |  |  |  |  |  |  |  |  | N/A |

¡Muchas gracias por su colaboración!
