# Supplementary material
Source: publisher figshare collection journal article supplement (https://tandf.figshare.com/articles/dataset/_/11985267)
Supplement: Supplementary file 2 [file 1]

Si una situación/afirmación determinada no es aplicable, por favor marque la casilla "N/A = no aplicable".

[illegible]
